# Supplementary material for: Characterization and quantification of microplastics and organic pollutants in mussels by microwave-assisted sample preparation and analytical pyrolysis
Source: Royal Society of Chemistry journal article supplement (doi:10.1039/d3va00216k), 2023-11-21
Supplement: d3va00216k1.pdf [file d3va00216k1.pdf]

# Characterization and quantification of microplastics and organic pollutants in mussels by microwave-assisted sample preparation and analytical pyrolysis

## SUPPLEMENTARY MATERIAL

Greta Biale<sup>1</sup>, Jacopo La Nasa<sup>1,2\*</sup>, Lorenzo Fiorentini<sup>1</sup>, Alessio Ceccarini<sup>1,2</sup>, Diego Carnaroglio<sup>3</sup>, Marco Mattonai<sup>1</sup>, Francesca Modugno<sup>1,2</sup>

<sup>1</sup> Department of Chemistry and Industrial Chemistry, Via Giuseppe Moruzzi 13, 56124, Pisa, Italy

<sup>2</sup> CISUP Centre for Instrument Sharing, University of Pisa, Pisa, Italy

<sup>3</sup> Milestone Srl, Sorisole (Bergamo), Italy

*Corresponding author:* marco.mattonai@dcc.i.unipi.it

*\*:co-first author*

**Table S.1-** List of the masses and  $m/z$  ions used for the SIM acquisition.

|     | Contaminant                                   | MW  | $m/z$ used for SIM acquisition |
|-----|-----------------------------------------------|-----|--------------------------------|
| PCB | 2,4,4'-Trichlorobiphenyl (PCB28)              | 256 | 256                            |
|     | 2,2',5,5'-Tetrachlorobiphenyl (PCB52)         | 290 | 292                            |
|     | 2,2',4,5,5'-Pentachlorobiphenyl (PCB101)      | 324 | 326                            |
|     | 2,2',3,4,4',5'-Hexachlorobiphenyl (PCB138)    | 358 | 360                            |
|     | 2,2',4,4',5,5'-Hexachlorobiphenyl (PCB153)    | 358 | 360                            |
|     | 2,2',3,4,4',5,5'-Heptachlorobiphenyl (PCB180) | 392 | 394                            |
|     | Decachlorobiphenyl (PCB209)                   | 494 | 498                            |
| PAH | naphthalene                                   | 128 | 128                            |
|     | acenaphthylene                                | 152 | 152                            |
|     | acenaphthene                                  | 152 | 152                            |
|     | fluorene                                      | 166 | 166                            |
|     | phenanthrene                                  | 178 | 178                            |
|     | anthracene                                    | 178 | 178                            |
|     | fluoranthene                                  | 202 | 202                            |
|     | pyrene                                        | 202 | 202                            |
|     | benz(a)anthracene                             | 228 | 228                            |
|     | chrysene                                      | 228 | 228                            |
|     | benzo(b)fluoranthene                          | 252 | 252                            |

|            |                                 |     |     |
|------------|---------------------------------|-----|-----|
|            | benzo(k)fluoranthene            | 252 | 252 |
|            | benzo(a)pyrene                  | 252 | 252 |
|            | dibenz[a,h]anthracene           | 278 | 278 |
|            | benzo[g,h,i]perylene            | 276 | 276 |
|            | indeno[1,2,3-C,D]pyrene         | 276 | 276 |
|            |                                 |     |     |
| <b>CEC</b> | methiocarb                      | 225 | 168 |
|            | diclofenac                      | 295 | 214 |
|            | 3-tert-butyl-4-hydroxyanisole   | 180 | 165 |
|            | 2-ethylhexyl 4-methoxycinnamate | 290 | 178 |
|            |                                 |     |     |
| <b>PAE</b> | dibutyl phthalate               | 278 | 149 |
|            | benzyl butyl phthalate          | 312 | 149 |
|            | bis (2-ethylhexyl) phthalate    | 390 | 149 |
|            | bis(7-methyloctyl) phthalate    | 418 | 149 |
|            | bis(8-methylnonyl) phthalate    | 446 | 149 |

**Table S.2-** Pyrolysis products and  $m/z$  quantification ions used for the quantitative analysis of microplastics.

| <b>Polymer</b> | <b>Pyrolysis product used for quantification</b>                                    | <b><math>m/z</math> quantification ion</b> |
|----------------|-------------------------------------------------------------------------------------|--------------------------------------------|
| PE             | $\alpha,\omega$ -alkenes C <sub>15</sub> -C <sub>25</sub><br>(average of the areas) | 82                                         |
| PP             | 2,4-dimethyl-1-heptene                                                              | 126                                        |
| PS             | 3-butene-1,3-<br>diylidibenzene (styrene<br>dimer)                                  | 91                                         |
| ABS            | 2-phenethyl-4-<br>phenylpent-4-enitrile<br>(SAS)                                    | 170                                        |
| SBR            | butadiene trimer                                                                    | 79                                         |
| PMMA           | methyl methacrylate<br>(MMA)                                                        | 100                                        |
| PC             | bisphenol A (BPA)                                                                   | 213                                        |
| PVC            | naphthalene                                                                         | 128                                        |
| PET            | benzoic acid (BA)                                                                   | 122                                        |
| N6             | caprolactam                                                                         | 133                                        |
| N66            | cyclopentanone                                                                      | 84                                         |

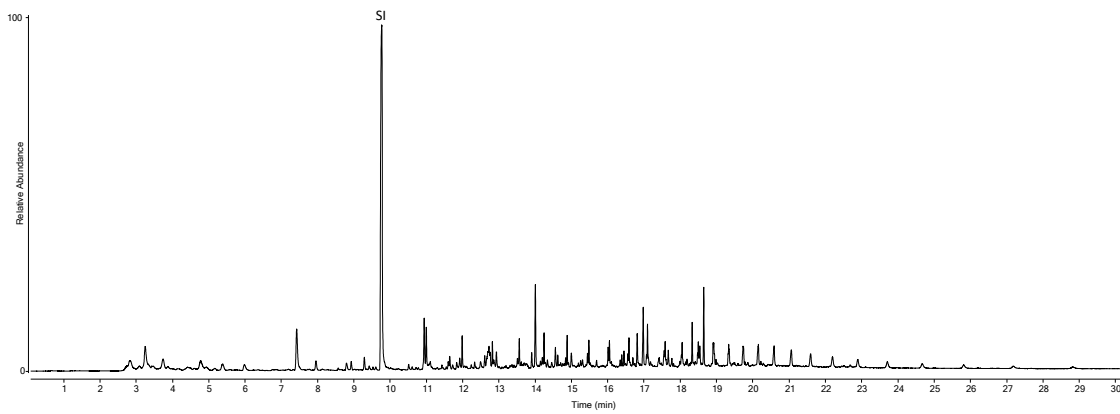

**Figure S.1-** Total ion chromatogram of the Py-GC-MS analysis of the filter with the particles after the digestion with HCl.

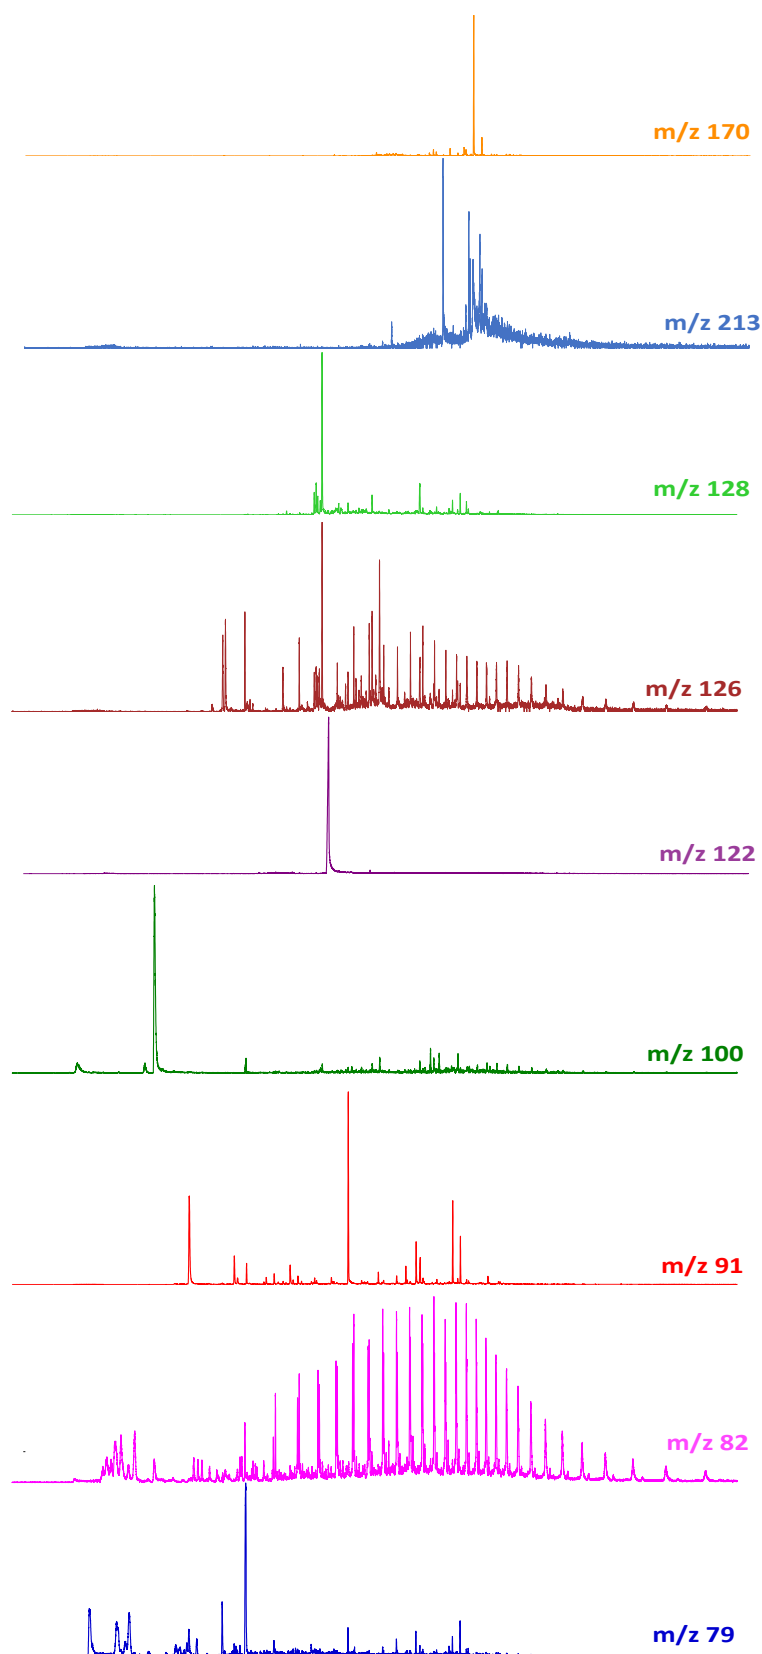

**Figure S.2-** Extracted ion chromatograms of the TIC reported in Figure S.1, using the  $m/z$  characteristic of the polymers:  $m/z$  79 for SBR, 82 for PE, 91 for PS, 100 for PMMA, 122 for PET, 126 for PP, 128 for PVC, 213 for PC, and 170 for ABS.
